# Supplementary material
Source: Frontiers journal article supplement (https://www.frontiersin.org/articles/421817)
Supplement: Table_1.XLSX [file Table_1.XLSX]

## Sheet: Obs wells head and precip
	Monthly data (groundwater level - meters above sea level)					12-month moving average data (gw level - m.a.s.l.)						Yearly data (average gw level - m.a.s.l.)
	Monthly Precipitation (mm)	Kumamoto OW-1 (Suizenji)	Kumamoto OW-5 (Kikuyo)	Kumamoto OW-10 (Mashiki)		Precipitation (mm)	Kumamoto OW-1 (Suizenji)	Kumamoto OW-5 (Kikuyo)	Kumamoto OW-10 (Mashiki)		Year	Yearly Precipitation (mm)	Kumamoto OW-1 (Suizenji)	Kumamoto OW-5 (Kikuyo)	Kumamoto OW-10 (Mashiki)
1982-04-01	108	7.24635	22.8907								1982	2050	7.5323	28.2656
1982-05-01	136	7.14943	22.1912								1983	1716	7.3822	27.0479
1982-06-01	79	7.08513	21.9205								1984	1724.5	7.18364	24.4678
1982-07-01	1263	7.41078	22.7346								1985	2121	7.18641	24.8732
1982-08-01	96.5	7.81793	31.3846								1986	1799.5	7.16291	24.5133
1982-09-01	118	7.81792	33.9791								1987	2752.5	7.35073	27.0768	17.6822
1982-10-01	53	7.84372	35.0172								1988	2204	7.37298	27.8007	17.6805
1982-11-01	156	7.78196	33.3206								1989	2104.5	7.23157	25.4064	16.461
1982-12-01	40.5	7.63745	30.952								1990	1952.5	7.14293	24.197	15.926
1983-01-01	34.5	7.48578									1991	2222.5	7.13441	21.364	15.8623
1983-02-01	53	7.36787									1992	1592.5	7.04066	23.0461	15.1674
1983-03-01	167	7.29185				192.042	7.49468				1993	3369	7.38254	27.4285	17.5632
1983-04-01	205.5	7.28937	24.3377			200.167	7.49827	28.4264			1994	920.5	7.17434	25.9548	16.7314
1983-05-01	207.5	7.27039	23.7438			206.125	7.50835	28.5989			1995	1875.5	6.941	21.9525	14.7104
1983-06-01	317	7.25103	23.8017			225.958	7.52217	28.8079			1996	1489.5	6.94392	22.2203	14.8586
1983-07-01	289.5	7.18855	25.9031			144.833	7.50365	29.16			1997	2395	7.08023	23.7003	15.6996
1983-08-01	106.5	7.34272	28.486			145.667	7.46405	28.8379			1998	1905	7.21426	25.6411	16.455
1983-09-01	227	7.60892	30.587			154.75	7.44663	28.461			1999	1946	7.07641	23.4031	15.5509
1983-10-01	76.5	7.60114	30.6671			156.708	7.42642	27.9777			2000	1825.5	7.00218	23.1985	15.2248
1983-11-01	4.5	7.51666	28.9479			144.083	7.40431	27.4918			2001	1798.5	6.97379	23.0517	15.0489
1983-12-01	27.5	7.37212	26.957			143	7.3822	27.0479			2002	1543.5	6.93397	22.3884	14.7767
1984-01-01	87.5	7.24922	25.318			147.417	7.36249	26.8749			2003	2256	6.99383	23.1934	15.0517
1984-02-01	41.5	7.16209	23.9832			146.458	7.34534	26.612			2004	1804.5	6.99963	22.877	15.2303
1984-03-01	86.5	7.06753	22.8821			139.75	7.32665	26.3012			2005	1324.5	6.9282	22.1241	14.8948
1984-04-01	112.5	7.01838	22.0495			132	7.30406	26.1105			2006	2800.5	7.14776	24.8925	16.1605
1984-05-01	176	7.00556	21.4037			129.375	7.28199	25.9155			2007	1810.5	7.15073	24.8585	16.2725
1984-06-01	495.5	7.09506	21.1846			144.25	7.269	25.6974			2008	2353	7.10163	23.4774	15.6197
1984-07-01	215	7.20093	23.3024			138.042	7.27003	25.4807			2009	1565.5	7.07258	23.4797	15.5322
1984-08-01	284.5	7.19748	25.4126			152.875	7.25793	25.2246			2010	2072.5	7.14499	24.0893	15.6874
1984-09-01	79.5	7.3401	27.7851			140.583	7.23552	24.9911			2011	2154.5	7.12909	23.8273	15.6324
1984-10-01	25	7.38404	28.412			136.292	7.21743	24.8032			2012	2209.5	7.24552	24.8296	16.3074
1984-11-01	78.5	7.3106	26.8398			142.458	7.20026	24.6275			2013	1930	7.1622	24.0366	15.825
1984-12-01	42.5	7.17271	25.0407			143.708	7.18364	24.4678			2014	1694	7.06851	22.704	15.1368
1985-01-01	16	7.02222	23.6553			137.75	7.16473	24.3292			2015	2292	7.11085	23.3532	15.3553
1985-02-01	121	6.94099	22.4925			144.375	7.1463	24.205			2016	2504	7.05162	26.378	16.4866
1985-03-01	236	6.939	21.6347			156.833	7.13559	24.1011			2017	1818.5	7.00181	27.1405	16.6971
1985-04-01	158	6.92315	21.1268			160.625	7.12765	24.0242
1985-05-01	208.5	6.91329	20.784			163.333	7.11996	23.9725
1985-06-01	434.5	7.0244	21.0813			158.25	7.11408	23.9639
1985-07-01	416.5	7.37376	24.4567			175.042	7.12848	24.0601
1985-08-01	58	7.34177	27.7546			156.167	7.1405	24.2553
1985-09-01	189.5	7.45081	29.9186			165.333	7.14973	24.4331
1985-10-01	132.5	7.53087	30.3279			174.292	7.16196	24.5927
1985-11-01	94	7.4569	28.6517			175.583	7.17416	24.7437
1985-12-01	56.5	7.31971	26.5945			176.75	7.18641	24.8732
1986-01-01	26	7.31857	24.8597			177.583	7.2111	24.9736
1986-02-01	57.5	7.05864	23.3726			172.292	7.2209	25.0469
1986-03-01	129.5	6.98332	22.2157			163.417	7.2246	25.0953
1986-04-01	117.5	6.92503	21.3738			160.042	7.22476	25.1159
1986-05-01	241	6.93377	20.8168			162.75	7.22646	25.1187
1986-06-01	434	6.92891	20.6741			162.708	7.21851	25.0847
1986-07-01	328.5	7.17661	22.9997			155.375	7.20208	24.9633
1986-08-01	122	7.20464	26.252			160.708	7.19065	24.8381
1986-09-01	156.5	7.37053	28.3927			157.958	7.18396	24.7109
1986-10-01	73.5	7.4164	28.9738			153.042	7.17442	24.5981
1986-11-01	22	7.38313	27.9867			147.042	7.16827	24.5427
1986-12-01	91.5	7.25542	26.2416			149.958	7.16291	24.5133
1987-01-01	67.5	7.15674	24.7688			153.417	7.14943	24.5057
1987-02-01	70.5	7.05646	23.5002			154.5	7.14925	24.5163
1987-03-01	234	7.01771	22.5402			163.208	7.15211	24.5434
1987-04-01	176.5	6.99538	21.98	14.8557		168.125	7.15798	24.5939	14.8557
1987-05-01	282.5	7.01956	21.7058	14.6283		171.583	7.16512	24.668	14.742
1987-06-01	246	7.09688	22.1081	14.6824		155.917	7.17912	24.7875	14.7221
1987-07-01	854.5	7.45472	25.0865	16.2443		199.75	7.2023	24.9614	15.1027
1987-08-01	477.5	7.71698	31.1908	19.2501		229.375	7.24499	25.3729	15.9321
1987-09-01	118.5	7.76738	33.5395	20.0874		226.208	7.27806	25.8018	16.6247
1987-10-01	148	7.76537	34.2686	20.3772		232.417	7.30714	26.2431	17.1608
1987-11-01	48	7.67621	33.0972	19.9296		234.583	7.33157	26.6689	17.5069
1987-12-01	29	7.48537	31.1357	19.0849		229.375	7.35073	27.0768	17.6822
1988-01-01	37.5	7.37634	29.2145	18.2576		226.875	7.36903	27.4473	17.7398
1988-02-01	70	7.28401	27.3088	17.4572		226.833	7.38799	27.7646	17.7141
1988-03-01	184	7.19037	25.6833	16.7978		222.667	7.40238	28.0266	17.6377
1988-04-01	140	7.14555	24.3933	16.2804		219.625	7.4149	28.2277	17.7564
1988-05-01	553	7.32924	24.427	16.3843		242.167	7.4407	28.4544	17.9028
1988-06-01	539	7.35255	25.1353	16.7044		266.583	7.46201	28.7067	18.0713
1988-07-01	249	7.38166	27.3094	17.5399		216.125	7.45592	28.8919	18.1792
1988-08-01	149	7.47537	29.6393	18.488		188.75	7.43578	28.7626	18.1157
1988-09-01	200	7.55421	31.1107	19.0173		195.542	7.41802	28.5602	18.0266
1988-10-01	27.5	7.55424	31.3745	19.0796		185.5	7.40043	28.3191	17.9184
1988-11-01	38	7.47488	29.9695	18.5019		184.667	7.38365	28.0584	17.7995
1988-12-01	17	7.35731	28.0428	17.6573		183.667	7.37298	27.8007	17.6805
1989-01-01	171.5	7.26569	26.31	16.9175		194.833	7.36376	27.5587	17.5688
1989-02-01	200.5	7.20558	25.0489	16.294		205.708	7.35722	27.3703	17.4719
1989-03-01	148.5	7.15956	23.8918	15.8675		202.75	7.35465	27.221	17.3943
1989-04-01	35.5	7.08471	23.1315	15.4941		194.042	7.34958	27.1159	17.3288
1989-05-01	291.5	7.08666	22.5615	15.2637		172.25	7.32937	26.9604	17.2354
1989-06-01	229.5	7.09052	22.7353	15.3113		146.458	7.30753	26.7604	17.1193
1989-07-01	264.5	7.15889	24.0462	15.8459		147.75	7.28897	26.4885	16.9782
1989-08-01	171	7.18456	25.6921	16.4774		149.583	7.26474	26.1596	16.8106
1989-09-01	454	7.41905	27.8555	17.4226		170.75	7.25347	25.8883	16.6777
1989-10-01	26	7.45069	29.0387	17.9834		170.625	7.24484	25.6936	16.5864
1989-11-01	87.5	7.39238	28.0783	17.6551		174.75	7.23797	25.536	16.5158
1989-12-01	24.5	7.28053	26.4866	17.0001		175.375	7.23157	25.4064	16.461
1990-01-01	92.5	7.17634	25.0447	16.3704		168.792	7.22412	25.3009	16.4154
1990-02-01	137.5	7.09773	23.7744	15.8151		163.542	7.21514	25.1947	16.3755
1990-03-01	153.5	7.03601	22.7445	15.3496		163.958	7.20484	25.0991	16.3324
1990-04-01	133.5	7.00588	21.9853	14.9928		172.125	7.19827	25.0036	16.2906
1990-05-01	231.5	7.0013	21.5376	14.7773		167.125	7.19116	24.9183	16.2501
1990-06-01	369	6.99485	21.5421	14.7326		178.75	7.18318	24.8188	16.2018
1990-07-01	338	7.22731	23.8625	15.8104		184.875	7.18889	24.8035	16.1989
1990-08-01	84	7.2144	25.9379	16.6088		177.625	7.19137	24.824	16.2098
1990-09-01	214.5	7.29655	27.1035	17.0913		157.667	7.18116	24.7614	16.1822
1990-10-01	117	7.32134	27.1057	17.1157		165.25	7.17038	24.6003	16.1099
1990-11-01	30	7.22776	25.6186	16.5499		160.458	7.15667	24.3953	16.0178
1990-12-01	51.5	7.11569	24.1073	15.8976		162.708	7.14293	24.197	15.926
1991-01-01	43.5	7.02198	22.8987	15.3575		158.625	7.13007	24.0182	15.8415
1991-02-01	76	6.9354	21.9003	14.8788		153.5	7.11654	23.862	15.7635
1991-03-01	209.5	6.90279	21.1263	14.5149		158.167	7.10544	23.7272	15.694
1991-04-01	141.5	6.88655	20.5798	14.2624		158.833	7.09549	23.61	15.6331
1991-05-01	243.5	6.90698	20.2058	14.0828		159.833	7.08763	23.499	15.5752
1991-06-01	722.5	7.03338	20.15	14.3906		189.292	7.09084	23.383	15.5467
1991-07-01	325	7.32053	22.687	16.2273		188.208	7.09861	23.2851	15.5815
1991-08-01	126.5	7.34214		17.2815		191.75	7.10926	23.0439	15.6375
1991-09-01	117.5	7.38488		17.7843		183.667	7.11662	22.638	15.6953
1991-10-01	67	7.40779		17.8244		179.5	7.12382	22.1415	15.7543
1991-11-01	94	7.28426		17.1919		184.833	7.12853	21.7069	15.8078
1991-12-01	56	7.18618		16.5514		185.208	7.13441	21.364	15.8623
1992-01-01	48	7.08392		15.8171		185.583	7.13957	21.1082	15.9006
1992-02-01	45	6.99694	22.8515	15.4021		183	7.1447	21.2667	15.9442
1992-03-01	350.5	6.99053	22.0242	14.9672		194.75	7.15201	21.4164	15.9819
1992-04-01	105	6.96355	21.5751	14.7823		191.708	7.15842	21.5823	16.0252
1992-05-01	102.5	6.91843	21.2175	14.5805		179.958	7.15938	21.7509	16.0667
1992-06-01	245.5	6.90155	21.231	14.5003		140.208	7.14839	21.931	16.0759
1992-07-01	151	6.97811	21.9984	14.7897		125.708	7.11986	21.8163	15.9561
1992-08-01	345	7.07908	23.2131	15.3484		143.917	7.09794	22.0158	15.795
1992-09-01	59	7.15271	25.2091			139.042	7.07859	22.415	15.6141
1992-10-01	14	7.21553	26.0849			134.625	7.06257	22.8228	15.3931
1992-11-01	56.5	7.15321	24.7315	15.9984		131.5	7.05165	23.0136	15.2737
1992-12-01	70.5	7.0544	23.3713	15.4876		132.708	7.04066	23.0461	15.1674
1993-01-01	55	6.98085	22.1591	14.9694		133.292	7.03208	22.9722	15.0826
1993-02-01	71.5	6.89326	21.2816	14.5379		135.5	7.02344	22.8414	14.9962
1993-03-01	135	6.84231	20.5579	14.2422		117.542	7.01108	22.7192	14.9237
1993-04-01	242	6.80905	19.9938	13.8804		128.958	6.99821	22.5874	14.8335
1993-05-01	147	6.85343	19.9041	13.841		132.667	6.99279	22.478	14.7595
1993-06-01	908	7.04605	20.761	14.2621		187.875	7.00483	22.4388	14.7357
1993-07-01	789.5	7.66892	27.7542	18.4399		241.083	7.0624	22.9185	15.1008
1993-08-01	440	7.96166	33.3025	20.5167		249	7.13595	23.7592	15.6176
1993-09-01	366	8.01738	36.5456	21.765		274.583	7.208	24.7039	16.1764
1993-10-01	69	7.99118	37.3089	22.0901		279.167	7.27264	25.6393	16.6692
1993-11-01	72.5	7.84205	35.877	21.6348		280.5	7.33004	26.5681	17.1389
1993-12-01	73.5	7.6844	33.6965	20.5793		280.75	7.38254	27.4285	17.5632
1994-01-01	46	7.55472	31.5666	19.6038		280	7.43037	28.2125	17.9494
1994-02-01	74	7.41523	29.496	18.6892		280.208	7.47386	28.897	18.2954
1994-03-01	46.5	7.29456	27.5833	17.8222		272.833	7.51155	29.4825	18.5937
1994-04-01	191.5	7.21555	25.8763	16.7993		268.625	7.54543	29.9727	18.8369
1994-05-01	51.5	7.13989	24.5499	16.2055		260.667	7.5693	30.3598	19.034
1994-06-01	221	7.08805	23.959	15.8087		203.417	7.5728	30.6263	19.1629
1994-07-01	75.5	7.01021	24.1012	15.7561		143.917	7.51791	30.3219	18.9392
1994-08-01	77.5	7.03763	24.9537	15.9843		113.708	7.4409	29.6262	18.5615
1994-09-01	6.5	7.12955	26.2686	16.5006		83.75	7.36692	28.7697	18.1228
1994-10-01	29	7.16279	25.9934	16.5176		80.4167	7.29788	27.8268	17.6584
1994-11-01	4.5	7.06455	24.2725	15.8599		74.75	7.23309	26.8597	17.1772
1994-12-01	97	6.9794	22.8371	15.2301		76.7083	7.17434	25.9548	16.7314
1995-01-01	48.5	6.90811	21.8294	14.7594		76.9167	7.12046	25.1434	16.3277
1995-02-01	31.5	6.81594	20.9201	14.3054		73.375	7.07052	24.4287	15.9624
1995-03-01	70	6.75811	20.1915	13.9154		75.3333	7.02581	23.8127	15.6369
1995-04-01	213	6.73755	19.6231	13.6203		77.125	6.98598	23.2916	15.3719
1995-05-01	123	6.77779	19.3295	13.4838		83.0833	6.95581	22.8566	15.1451
1995-06-01	248	6.74555	19.2998	13.3809		85.3333	6.92726	22.4683	14.9428
1995-07-01	504	7.03311	21.2066	14.3825		121.042	6.92917	22.2271	14.8284
1995-08-01	182.5	6.98408	23.0557	15.1194		129.792	6.92471	22.069	14.7563
1995-09-01	315	7.17605	25.013	15.9996		155.5	6.92859	21.9643	14.7145
1995-10-01	76.5	7.20666	25.4794	16.3241		159.458	6.93224	21.9215	14.6984
1995-11-01	55.5	7.12671	24.375	15.8968		163.708	6.93742	21.93	14.7015
1995-12-01	8	7.02231	23.1068	15.3372		156.292	6.941	21.9525	14.7104
1996-01-01	58	6.93682	22.0575	14.8205		157.083	6.94339	21.9715	14.7155
1996-02-01	43.5	6.84143	21.1612	14.39		158.083	6.94551	21.9916	14.7225
1996-03-01	146	6.78601	20.4086	14.0759		164.417	6.94784	22.0097	14.7359
1996-04-01	109.5	6.72805	19.753	13.7171		155.792	6.94705	22.0205	14.744
1996-05-01	41	6.71714	19.3444	13.5193		148.958	6.94199	22.0217	14.7469
1996-06-01	637	6.81438	19.4451	13.5806		181.375	6.94773	22.0338	14.7636
1996-07-01		7.02295	21.5341	14.6212		152.045	6.94688	22.0611	14.7835
1996-08-01	176.5	7.07231	23.6821	15.5509		151.5	6.95423	22.1133	14.8194
1996-09-01	127.5	7.16405	25.4836	16.2574		134.455	6.95323	22.1526	14.8409
1996-10-01	40.5	7.1736	25.8126	16.4357		131.182	6.95048	22.1803	14.8502
1996-11-01	72.5	7.08321	24.647	15.9558		132.727	6.94685	22.203	14.8551
1996-12-01	37.5	6.98714	23.315	15.3793		135.409	6.94392	22.2203	14.8586
1997-01-01	47.5	6.89601	22.1763	14.8347		134.455	6.94052	22.2302	14.8598
1997-02-01	52	6.80433	21.2369	14.3684		135.227	6.93743	22.2366	14.858
1997-03-01	113.5	6.75666	20.5023	14.0091		132.273	6.93499	22.2444	14.8525
1997-04-01	224	6.75321	19.9708	13.7541		142.682	6.93708	22.2625	14.8555
1997-05-01	164.5	6.76085	19.7026	13.6375		153.909	6.94073	22.2924	14.8654
1997-06-01	209.5	6.78205	19.9865	13.7129		115.045	6.93803	22.3375	14.8764
1997-07-01	923	7.29787	23.4984	15.3201		182.375	6.96094	22.5012	14.9347
1997-08-01	220.5	7.3853	27.4494	17.4636		186.042	6.98702	22.8151	15.0941
1997-09-01	181	7.45988		18.2058		190.5	7.01168	22.5725	15.2564
1997-10-01	3	7.43811	30.0345	18.2425		187.375	7.03372	22.9563	15.407
1997-11-01	174.5	7.36038	28.861	17.7111		195.875	7.05682	23.3394	15.5533
1997-12-01	82	7.26811	27.2849	17.1351		199.583	7.08023	23.7003	15.6996
1998-01-01	149	7.19005	25.8231	16.5423		208.042	7.10473	24.0319	15.8419
1998-02-01	88	7.10737	24.5598	16.0234		211.042	7.12999	24.3339	15.9798
1998-03-01	107.5	7.04585	23.4987	15.5591		210.542	7.15409	24.6063	16.109
1998-04-01	228.5	7.03621	22.7093	15.2281		210.917	7.17767	24.8553	16.2318
1998-05-01	162	7.06827	22.4539	15.1367		210.708	7.20329	25.1054	16.3567
1998-06-01	653	7.19055	23.2055	15.4744		247.667	7.23733	25.398	16.5035
1998-07-01	150.5	7.30811	26.2421	16.7762		183.292	7.23818	25.6475	16.6249
1998-08-01	40	7.33392	27.892	17.3546		168.25	7.2339	25.6877	16.6158
1998-09-01	116	7.38305	29.2028	17.8124		162.833	7.2275	25.9806	16.583
1998-10-01	178.5	7.4086	28.8907	17.7962		177.458	7.22504	25.8853	16.5458
1998-11-01	30	7.30521	27.4136	17.2099		165.417	7.22044	25.7647	16.504
1998-12-01	2	7.19392	25.8013	16.547		158.75	7.21426	25.6411	16.455
1999-01-01	19.5	7.09343	24.3754	15.9496		147.958	7.20621	25.5204	16.4056
1999-02-01	48	6.99308	23.1462	15.4049		144.625	7.19668	25.4026	16.3541
1999-03-01	112.5	6.93438	22.187	14.9465		145.042	7.18739	25.2933	16.303
1999-04-01	67	6.88821	21.3971	14.5594		131.583	7.17506	25.184	16.2473
1999-05-01	178.5	6.87198	20.7347	14.2412		132.958	7.1587	25.0407	16.1727
1999-06-01	630.5	6.94488	20.6051	14.1939		131.083	7.13823	24.824	16.066
1999-07-01	231.5	7.1044	22.6242	15.1533		137.833	7.12126	24.5225	15.9307
1999-08-01	92	7.13182	23.7769	15.7318		142.167	7.10441	24.1796	15.7955
1999-09-01	434	7.27488		16.4874		168.667	7.0954	23.7229	15.6851
1999-10-01	30	7.30095	26.9512	17.0064		156.292	7.08643	23.5466	15.6193
1999-11-01	80.5	7.23821	26.302	16.7179		160.5	7.08085	23.4456	15.5783
1999-12-01	22	7.14069	25.3344	16.2184		162.167	7.07641	23.4031	15.5509
2000-01-01	88	7.0565	23.9675	15.6973		167.875	7.07333	23.366	15.5299
2000-02-01	49	6.96781	22.8375	15.2128		167.958	7.07123	23.338	15.5139
2000-03-01	96	6.8836	22.0294	14.7899		166.583	7.06699	23.3236	15.5008
2000-04-01	76	6.85021	21.3051	14.4193		167.333	7.06383	23.3153	15.4891
2000-05-01	250	6.83698	20.7644	14.151		173.292	7.06091	23.318	15.4816
2000-06-01	445.5	6.90805	20.7918	14.1508		157.875	7.05784	23.3349	15.478
2000-07-01	160	6.96747	22.2426	14.7709		151.917	7.04643	23.3002	15.4462
2000-08-01	148.5	7.0541	24.1133	15.5081		156.625	7.03995	23.3308	15.4275
2000-09-01	131.5	7.15353	26.0256	16.2783		131.417	7.02984	23.5554	15.4101
2000-10-01	131.5	7.17755	25.9726	16.3552		139.875	7.01956	23.4738	15.3558
2000-11-01	192	7.13555	24.7121	15.9206		149.167	7.011	23.3414	15.2894
2000-12-01	57.5	7.03489	23.6199	15.4436		152.125	7.00218	23.1985	15.2248
2001-01-01	86	6.95279	22.611	15.0004		151.958	6.99354	23.0854	15.1667
2001-02-01	103.5	6.88726	21.8291	14.6145		156.5	6.98683	23.0014	15.1169
2001-03-01	80	6.83279	21.2133	14.2876		155.167	6.9826	22.9334	15.075
2001-04-01	71	6.77071	20.6823	14.0684		154.75	6.97597	22.8815	15.0458
2001-05-01	42	6.77053	20.292	13.764		137.417	6.97043	22.8421	15.0135
2001-06-01	526	6.79038	20.3106	13.7543		144.125	6.96063	22.802	14.9805
2001-07-01	358	6.99601	22.3178	14.6773		160.625	6.96301	22.8083	14.9727
2001-08-01	42	7.10214	24.9389	15.7872		151.75	6.96701	22.8771	14.996
2001-09-01	187	7.20405	26.8638	16.5414		156.375	6.97122	22.9469	15.0179
2001-10-01	133	7.21811	26.7052	16.6038		156.5	6.9746	23.008	15.0386
2001-11-01	130	7.13155	25.1375	16.0389		151.333	6.97427	23.0434	15.0485
2001-12-01	40	7.02921	23.7195	15.4488		149.875	6.97379	23.0517	15.0489
2002-01-01	52.5	6.9439	22.5841	14.9409		147.083	6.97305	23.0495	15.0439
2002-02-01	83	6.85476	21.7169	14.4886		145.375	6.97035	23.0402	15.0334
2002-03-01	112	6.80876	21.0586	14.1514		148.042	6.96834	23.0273	15.0221
2002-04-01	162.5	6.78271	20.5208	13.8628		155.667	6.96934	23.0138	15.0049
2002-05-01	313.5	6.84989	20.1383	13.8399		178.292	6.97596	23.001	15.0113
2002-06-01	241	6.83955	20.6808	14.0989		154.542	6.98005	23.0318	15.04
2002-07-01	181.5	6.94811	21.9594	14.6452		139.833	6.97606	23.002	15.0373
2002-08-01	63	7.0086	23.6392	14.9889		141.583	6.96827	22.8937	14.9708
2002-09-01	55.5	7.10971	25.3338	16.047		130.625	6.9604	22.7662	14.9296
2002-10-01	72.5	7.11247	25.1363	16.0402		125.583	6.9516	22.6354	14.8826
2002-11-01	109	7.01671	23.5846	15.4051		123.833	6.94203	22.506	14.8298
2002-12-01	97.5	6.93247	22.3079	14.811		128.625	6.93397	22.3884	14.7767
2003-01-01	52	6.83763	21.2644	14.2984		128.583	6.92511	22.2784	14.7231
2003-02-01	58	6.74273	20.485	13.8784		126.5	6.91578	22.1758	14.6723
2003-03-01	122	6.7044	19.882	13.5607		127.333	6.90708	22.0777	14.6231
2003-04-01	246.5	6.70155	19.5273	13.3374		134.333	6.90032	21.9949	14.5793
2003-05-01	176	6.744	19.4562	13.298		122.875	6.89149	21.9381	14.5341
2003-06-01	364	6.79138	20.0177	13.5331		133.125	6.88748	21.8828	14.487
2003-07-01	589	7.0494	22.327	14.643		167.083	6.89592	21.9134	14.4868
2003-08-01	362.5	7.25682	25.7112	15.9516		192.042	6.91661	22.0861	14.567
2003-09-01	30.5	7.34921	28.4196	17.4153		189.958	6.93656	22.3433	14.681
2003-10-01	23	7.33085	28.6575	17.4618		185.833	6.95476	22.6367	14.7995
2003-11-01	193.5	7.26488	27.0891	16.9296		192.875	6.97544	22.9287	14.9265
2003-12-01	39	7.15316	25.4844	16.3128		188	6.99383	23.1934	15.0517
2004-01-01	35	7.04118	24.1063	15.7294		186.583	7.0108	23.4303	15.1709
2004-02-01	84	6.93668	22.9357	15.19		188.75	7.02696	23.6345	15.2802
2004-03-01	113	6.87908	21.9613	14.726		188	7.04152	23.8078	15.3773
2004-04-01	139	6.83003	21.2107	14.3442		179.042	7.05222	23.9481	15.4612
2004-05-01	372	6.8858	20.8626	14.187		195.375	7.06404	24.0653	15.5353
2004-06-01	121	6.93355	21.5538	14.5585		175.125	7.07589	24.1933	15.6208
2004-07-01	95.5	6.96791	22.6824	15.1533		134	7.0691	24.2229	15.6633
2004-08-01	169.5	7.05276	23.6719	15.579		117.917	7.05209	24.0529	15.6322
2004-09-01	328	7.16962	24.6275	16.0382		142.708	7.03713	23.7369	15.5175
2004-10-01	172	7.16923	24.6439	16.1284		155.125	7.02366	23.4025	15.4064
2004-11-01	61.5	7.10284	23.6299	15.7739		144.125	7.01015	23.1142	15.3101
2004-12-01	114	7.02687	22.6383	15.3558		150.375	6.99963	22.877	15.2303
2005-01-01	48	6.94175	21.7257	14.9414		151.458	6.99134	22.6787	15.1646
2005-02-01	99.5	6.86902	20.9761	14.5494		152.75	6.98571	22.5154	15.1113
2005-03-01	128	6.80022	20.3702	14.1951		154	6.97913	22.3828	15.067
2005-04-01	92	6.74832	19.9621	13.8812		150.083	6.97232	22.2787	15.0284
2005-05-01	135	6.78666	19.7248	13.7966		130.333	6.96406	22.1839	14.9959
2005-06-01	92.5	6.76809	20.2614	13.9517		127.958	6.95027	22.0762	14.9453
2005-07-01	365	6.9244	21.7248	14.6165		150.417	6.94665	21.9964	14.9006
2005-08-01	73	7.0028	23.5035	15.3492		142.375	6.94249	21.9824	14.8814
2005-09-01	147	7.14314	25.4123	16.1763		127.292	6.94028	22.0478	14.893
2005-10-01	41	7.14263	25.3762	16.2952		116.375	6.93806	22.1088	14.9069
2005-11-01	72.5	7.0548	23.9449	15.7742		117.292	6.93406	22.135	14.9069
2005-12-01	31	6.95651	22.5069	15.2111		110.375	6.9282	22.1241	14.8948
2006-01-01	61	6.87213	21.4283	14.6956		111.458	6.92239	22.0993	14.8743
2006-02-01	117.5	6.79939	20.5961	14.2542		112.958	6.91659	22.0676	14.8497
2006-03-01	101.5	6.75295	19.9375	13.9106		110.75	6.91265	22.0316	14.826
2006-04-01	215.5	6.74553	19.4415	13.6481		121.042	6.91242	21.9882	14.8066
2006-05-01	213.5	6.78287	19.3113	13.57		127.583	6.9121	21.9537	14.7877
2006-06-01	642	6.86162	19.9868	13.8364		173.375	6.9199	21.9308	14.7781
2006-07-01	789	7.3183	24.4205	16.1497		208.708	6.95272	22.1555	14.9059
2006-08-01	427.5	7.59442	30.5476	18.7608		238.25	7.00202	22.7425	15.1902
2006-09-01	93.5	7.67952	32.7066	19.446		233.792	7.04672	23.3504	15.4627
2006-10-01	11	7.58452	32.1828	19.2975		231.292	7.08355	23.9176	15.7129
2006-11-01	81	7.4545	30.0687	18.5865		232	7.11686	24.4279	15.9472
2006-12-01	47.5	7.32733	28.0819	17.7702		233.375	7.14776	24.8925	16.1605
2007-01-01	33.5	7.21347	26.1448	16.9895		231.083	7.1762	25.2855	16.3516
2007-02-01	76	7.1029	24.5019	16.2751		227.625	7.2015	25.611	16.52
2007-03-01	104.5	7.01243	23.0861	15.6461		227.875	7.22312	25.8734	16.6647
2007-04-01	108.5	6.94494	21.9321	15.0922		218.958	7.23974	26.0809	16.785
2007-05-01	141	6.94607	21.2799	14.7632		212.917	7.25333	26.245	16.8844
2007-06-01	184	6.91824	21.3413	14.6865		174.75	7.25805	26.3578	16.9553
2007-07-01	674.5	7.25326	24.2125	15.9386		165.208	7.25263	26.3405	16.9377
2007-08-01	175.5	7.28761	26.9717	17.0247		144.208	7.22707	26.0425	16.793
2007-09-01	80.5	7.36078	28.9392	17.7404		143.125	7.20051	25.7286	16.6509
2007-10-01	134.5	7.36159	28.6721	17.7748		153.417	7.18193	25.436	16.524
2007-11-01	31	7.26257	26.5824	17.0552		149.25	7.16593	25.1455	16.3964
2007-12-01	67	7.14494	24.6385	16.2836		150.875	7.15073	24.8585	16.2725
2008-01-01	136.5	7.05057	23.0884	15.6191		159.458	7.13716	24.6038	16.1583
2008-02-01	43.5	6.95496	21.8615	15.0797		156.75	7.12483	24.3838	16.0587
2008-03-01	90.5	6.87507	20.9665	14.5902		155.583	7.11338	24.2072	15.9707
2008-04-01	115.5	6.8357	20.2501	14.2167		156.167	7.10428	24.067	15.8977
2008-05-01	209.5	6.83893	19.7784	13.923		161.875	7.09535	23.9419	15.8277
2008-06-01	776	7.02226	20.3868	14.2119		211.208	7.10402	23.8624	15.7881
2008-07-01	204	7.23116	24.047	15.8658		172	7.10218	23.8486	15.7821
2008-08-01	226.5	7.25421	25.686	16.5617		176.25	7.0994	23.7414	15.7435
2008-09-01	294.5	7.32745	27.1364	17.0519		194.083	7.09662	23.5912	15.6861
2008-10-01	62	7.36454	27.4552	17.2218		188.042	7.09686	23.4898	15.64
2008-11-01	88.5	7.27994	26.254	16.8179		192.833	7.09831	23.4624	15.6203
2008-12-01	106	7.18476	24.8179	16.2764		196.083	7.10163	23.4774	15.6197
2009-01-01	54.5	7.09231	23.5991	15.7672		189.25	7.10511	23.5199	15.632
2009-02-01	133.5	7.03369	22.6594	15.3266		196.75	7.11167	23.5864	15.6526
2009-03-01	144.5	6.99575	22.0243	15.0007		201.25	7.12172	23.6746	15.6868
2009-04-01	80	6.94424	21.3409	14.718		198.292	7.13077	23.7655	15.7286
2009-05-01	69	6.91998	20.9476	14.5354		186.583	7.13752	23.8629	15.7796
2009-06-01	246	6.89889	21.3484	14.5545		142.417	7.12724	23.943	15.8082
2009-07-01	429	7.08714	22.8952	15.1918		161.167	7.11524	23.847	15.752
2009-08-01	66.5	7.18511	24.8356	16.0023		147.833	7.10948	23.7762	15.7054
2009-09-01	34	7.23512	26.5675	16.674		126.125	7.10179	23.7288	15.6739
2009-10-01	129.5	7.25649	26.6492	16.8547		131.75	7.09278	23.6616	15.6433
2009-11-01	112	7.16145	25.0886	16.2121		133.708	7.08291	23.5645	15.5928
2009-12-01	67	7.06083	23.8012	15.5491		130.458	7.07258	23.4797	15.5322
2010-01-01	47.5	6.95681	22.5246	14.9586		129.875	7.06129	23.3902	15.4648
2010-02-01	192	6.91514	21.6706	14.5183		134.75	7.05141	23.3078	15.3975
2010-03-01	176.5	6.891	21.0393	14.2051		137.417	7.04268	23.2257	15.3312
2010-04-01	225.5	6.88374	20.6233	13.9937		149.542	7.03764	23.1659	15.2708
2010-05-01	284.5	6.94814	20.3949	14.0234		167.5	7.03999	23.1199	15.2281
2010-06-01	401	7.02901	21.4895	14.5664		180.417	7.05083	23.1316	15.2291
2010-07-01	362	7.32103	23.5688	15.9148		174.833	7.07032	23.1878	15.2894
2010-08-01	58	7.39167	27.4906	17.1034		174.125	7.08753	23.409	15.3811
2010-09-01	118	7.4537	29.3346	17.7755		181.125	7.10575	23.6396	15.4729
2010-10-01	85	7.44296	29.0581	17.8157		177.417	7.12129	23.8404	15.553
2010-11-01	29	7.31414	26.9113	17.0713		170.5	7.13401	23.9922	15.6246
2010-12-01	93.5	7.19253	24.9656	16.3033		172.708	7.14499	24.0893	15.6874
2011-01-01	2.5	7.0674	23.2955	15.6019		168.958	7.15421	24.1535	15.7411
2011-02-01	39.5	6.95683	22.1174	15.0254		156.25	7.15768	24.1907	15.7833
2011-03-01	50.5	6.87306	21.1398	14.4743		145.75	7.15618	24.1991	15.8058
2011-04-01	67	6.82671	20.3581	14.049		132.542	7.15143	24.177	15.8104
2011-05-01	125.5	6.82081	19.8339	13.7662		119.292	7.14082	24.1303	15.7889
2011-06-01	928.5	7.05932	20.5031	14.1156		163.25	7.14335	24.0481	15.7514
2011-07-01	253	7.27231	24.3662	15.8937		154.167	7.13929	24.1145	15.7496
2011-08-01	384.5	7.33733	26.5193	16.7464		181.375	7.13476	24.0336	15.7199
2011-09-01	75.5	7.40263	27.8029	17.2365		177.833	7.1305	23.9059	15.6749
2011-10-01	107	7.40851	28.2092	17.4417		179.667	7.12763	23.8352	15.6438
2011-11-01	88.5	7.32138	26.7673	16.9509		184.625	7.12824	23.8232	15.6337
2011-12-01	32.5	7.20283	25.0142	16.2869		179.542	7.12909	23.8273	15.6324
2012-01-01	25.5	7.09462	23.5584	15.6831		181.458	7.13136	23.8492	15.6391
2012-02-01	129	7.02056	22.3502	15.1609		188.917	7.13667	23.8686	15.6504
2012-03-01	200	7.14616	23.8999	15.6734		201.375	7.15943	24.0986	15.7504
2012-04-01	99	6.94934	20.9456	14.4648		204.042	7.16965	24.1475	15.785
2012-05-01	59	6.93081	20.582	14.2556		198.5	7.17882	24.2099	15.8258
2012-06-01	698.5	7.02752	20.8158	14.355		179.333	7.17617	24.2359	15.8457
2012-07-01	488.5	7.37812	24.2966	16.1797		198.958	7.18499	24.2301	15.8696
2012-08-01	142.5	7.52237	29.8808	18.0021		178.792	7.20041	24.5102	15.9742
2012-09-01	111	7.57103	30.9528	18.4916		181.75	7.21444	24.7727	16.0788
2012-10-01	97	7.5385	31.0135	18.4337		180.917	7.22527	25.0064	16.1615
2012-11-01	70.5	7.4448		17.8932		179.417	7.23556	24.8463	16.24
2012-12-01	89	7.32237		17.0961		184.125	7.24552	24.8296	16.3074
2013-01-01		7.20314		16.3639		198.545	7.25456	24.9708	16.3642
2013-02-01	166.5	7.1085	23.6677	15.7704		201.955	7.26189	25.1172	16.4149
2013-03-01	110	7.25418	24.9865	16.3839		193.773	7.27089	25.2379	16.4742
2013-04-01	164	7.01328	22.0996	14.9168		199.682	7.27622	25.3661	16.5118
2013-05-01	53.5	6.98041	21.3136	14.6365		199.182	7.28035	25.4474	16.5436
2013-06-01	308	6.99851	21.3814	14.5938		163.682	7.27793	25.5103	16.5635
2013-07-01	118.5	7.05377	22.4935	15.0815		130.045	7.25091	25.3099	16.4719
2013-08-01	571	7.12628	23.5918	15.4812		169	7.2179	24.6112	16.2619
2013-09-01	199	7.35837	26.0853	16.5646		177	7.20018	24.0703	16.1013
2013-10-01	109	7.37202	27.5971	17.2093		178.091	7.1863	23.6907	15.9993
2013-11-01	80	7.29599	26.4058	16.7867		178.955	7.1739	23.9622	15.9071
2013-12-01	50.5	7.182	24.7804	16.1118		175.455	7.1622	24.0366	15.825
2014-01-01	36	7.08092	23.386	15.502		163.833	7.15202	23.9824	15.7532
2014-02-01	120.5	7.00543	22.3935	15.0484		160	7.14343	23.8762	15.693
2014-03-01	130	7.1195	23.6311	15.5652		161.667	7.13221	23.7633	15.6248
2014-04-01	69	6.95406	21.5116	14.5975		153.75	7.12727	23.7143	15.5982
2014-05-01	135	6.95196	21.1149	14.425		160.542	7.1249	23.6977	15.5806
2014-06-01	258.5	6.97585	21.1326	14.4125		156.417	7.12301	23.677	15.5655
2014-07-01	358	7.11495	22.1961	14.9195		176.375	7.12811	23.6522	15.552
2014-08-01	213	7.14835	23.2344	15.3535		146.542	7.12995	23.6224	15.5413
2014-09-01	107	7.17426	23.9333	15.6268		138.875	7.11461	23.4431	15.4632
2014-10-01	142	7.17092	24.2158	15.7309		141.625	7.09785	23.1613	15.34
2014-11-01	62.5	7.11217	23.4648	15.5001		140.167	7.08253	22.9162	15.2328
2014-12-01	62.5	7.01373	22.2335	14.9603		141.167	7.06851	22.704	15.1368
2015-01-01	99.5	6.9295	21.2858	14.4994		146.458	7.05589	22.529	15.0533
2015-02-01	33.5	6.86067	20.5484	14.138		139.208	7.04383	22.3752	14.9774
2015-03-01	186	7.02047	22.0708	14.8349		143.875	7.03557	22.2452	14.9165
2015-04-01	150.5	6.82998	19.6005	13.6624		150.667	7.02523	22.0859	14.8386
2015-05-01	131	6.83413	19.4191	13.5766		150.333	7.01542	21.9446	14.7679
2015-06-01	628	7.03906	20.4099	14.1042		181.125	7.02068	21.8844	14.7422
2015-07-01	375.5	7.21147	23.4121	15.4672		182.583	7.02873	21.9857	14.7879
2015-08-01	246	7.2933	25.9251	16.4709		185.333	7.04081	22.2099	14.881
2015-09-01	149.5	7.41174	27.2597	17.0889		188.875	7.0606	22.4871	15.0028
2015-10-01	64.5	7.37638	27.8258	17.2131		182.417	7.07772	22.788	15.1263
2015-11-01	136.5	7.31412	27.0219	16.9041		188.583	7.09455	23.0844	15.2433
2015-12-01	91.5	7.2094	25.4596	16.3042		191	7.11085	23.3532	15.3553
2016-01-01	70.5	7.1087	24.1347	15.7749		188.583	7.12579	23.5906	15.4616
2016-02-01	74	7.02263	23.0186	15.2868		191.958	7.13928	23.7965	15.5574
2016-03-01	60	7.13451	23.8025	15.5609		181.458	7.14879	23.9408	15.6179
2016-04-01	178.5	6.62076	20.9696	14.0034		183.792	7.13135	24.0549	15.6463
2016-05-01	273	6.63679	22.1459	14.5714		195.625	7.11491	24.2821	15.7292
2016-06-01	643.5	6.81218	23.3068	15.1245		196.917	7.096	24.5235	15.8142
2016-07-01	389.5	7.16847	27.7226	16.8362		198.083	7.09242	24.8827	15.9283
2016-08-01	62	7.25565	30.8386	18.4378		182.75	7.08928	25.2922	16.0922
2016-09-01	336.5	7.29296	31.2209	18.5144		198.333	7.07938	25.6223	16.211
2016-10-01	201	7.2732	30.7923	18.3554		209.708	7.07078	25.8695	16.3062
2016-11-01	109.5	7.18721	29.8468	17.9178		207.458	7.0602	26.1049	16.3906
2016-12-01	106	7.1064	28.7367	17.456		208.667	7.05162	26.378	16.4866
2017-01-01	44	7.02098	27.7416	17.0244		206.458	7.04431	26.6786	16.5907
2017-02-01	69.5	6.94058	26.8044	16.6018		206.083	7.03747	26.9941	16.7003
2017-03-01	70	7.01633	27.1699	16.7534		206.917	7.02762	27.2747	16.7997
2017-04-01	202.5	6.873	25.1491	15.8631		208.917	7.04864	27.623	16.9547
2017-05-01	150	6.85442	24.7439	15.7048		198.667	7.06678	27.8395	17.0491
2017-06-01	202.5	6.86108	25.0377	15.7871		161.917	7.07086	27.9837	17.1044
2017-07-01	408.5	7.06628	27.1232	16.6422		163.5	7.06234	27.9338	17.0882
2017-08-01	158	7.08657	28.7352	17.2899		171.5	7.04825	27.7585	16.9925
2017-09-01	241	7.13472	29.3254	17.5699		163.542	7.03506	27.6005	16.9138
2017-10-01	196	7.13339	28.9737	17.4345		163.125	7.02341	27.449	16.8371
2017-11-01	60.5	7.06672	28.1288	17.1209		159.042	7.01337	27.3058	16.7707
2017-12-01	16	6.96766	26.7532	16.5733		151.542	7.00181	27.1405	16.6971

## Sheet: Water depth and pump costs
Location	Caliber (mm)	Flow rate (m3/min)	Pumping distance to user (m)	Energy (Kw)	Power (V)	Static water level (m)	Water level during pumping (m)	Annual amount of water pumped per well (m3)	Electricity for annual pumping (kWh)	Electric energy per pumped amount (kWh/m3)	Lift (m)
Yanagimizu 3rd water source	125	1.04	100	37	200	―	―	335219	125664	0.374871
Muro water source	100	0.9	197	55	400	-129	-129.15	356555	214248	0.600883	129
Okino 2nd water source	125	2	75	37	200	-47.3	-48.6	149644	56504	0.377589	47.3
Horikawa water source	100	0.9	107	37	200	-96.73	-97.35	129876	53624	0.412886	96.73
Hirakawa 1st water source	100	1.55	90	37	200	―	―	69925	41631	0.595366
Hirakawa 2nd water source	65	0.52	135	18.5	200	-91.99	-92.43	83938	50001	0.59569	91.99
Tsutsujidai 2nd water source	100	1	150	45	400	-120.84	-122.47	161549	89628	0.554804	120.84
Hiyoshigaoka 2nd water source	80	0.7	228	37	400	―	―	119218	112933	0.947281
Isemaebaru 2nd water source	40	0.12	105	5.5	200	-75.77	-80.92	7128	9077	1.27343	75.77
Takaono 2nd water source	100	1.2	230	75	400	-182.47	-185.23	93860	93558	0.996782	185.23

## Sheet: Kumamoto pumping
Sources:
http://www.kumamoto-waterworks.jp/wp-content/uploads/020500.pdf					(2006-2010)
http://www.kumamoto-waterworks.jp/wp-content/uploads/02(1).pdf					(2010-2014)
http://www.kumamoto-waterworks.jp/wp-content/uploads/28_2.pdf					(2012-2016)
Annual water intake by source area (m3)							Electricity required per unit of water (kWh/m3)
	Year	PW-6 Kengun	PW-8 Shoguchi	PW-10 Takuma	Total		Year	PW-6 Kengun	PW-8 Shoguchi	PW-10 Takuma
57	1982	27924118		2729056	30653174		1982	0.39545		0.876436
58	1983	30505150	736920	2869602	34111672		1983	0.35753	0.43262	0.834824
59	1984	28848320	7778740	3308823	39935883		1984	0.357662	0.222419	0.840836
60	1985	25582120	12028700	3185387	40796207		1985	0.34968	0.219543	0.896098
61	1986	26191760	11223790	3510726	40926276		1986	0.33214	0.218235	0.896013
62	1987	26260487	10023281	3694359	39978127		1987	0.333578	0.208521	0.903891
0	1988	27430690	10588473	3637594	41656757		1988	0.336612	0.204073	0.927895
1	1989	29781760	10284950	3618181	43684891		1989	0.347143	0.201835	0.911301
2	1990	28510460	12114760	3531802	44157022		1990	0.352615	0.153144	0.925211
3	1991	28507280	12692991	3505527	44705798		1991	0.354973	0.150932	0.93972
4	1992	26063099	11338454	3409565	40811118		1992	0.313575	0.20479	0.982883
5	1993	25787830	11132749	3477069	40397648		1993	0.297737	0.205755	0.939577
6	1994	26048820	11621500	3417346	41087666		1994	0.302451	0.206701	0.971637
7	1995	24567093	12348105	3350006	40265204		1995	0.299632	0.200067	0.986644
8	1996	24399496	13092129	3348861	40840486		1996	0.312056	0.198133	1.00553
9	1997	23937445	11271427	3337510	38546382		1997	0.323553	0.171098	1.00696
10	1998	23145411	11383103	3226596	37755110		1998	0.284905	0.190818	0.968034
11	1999	25319289	10329292	3185338	38833919		1999	0.282373	0.187698	0.991556
12	2000	26534563	9553430	3187413	39275406		2000	0.284291	0.183226	0.98558
13	2001	26162153	9275992	3198750	38636895		2001	0.28961	0.178786	0.986139
14	2002	26338558	8097121	3176562	37612241		2002	0.301645	0.175546	0.97135
15	2003	26261859	7662292	3093758	37017909		2003	0.307059	0.174057	0.997923
16	2004	24673392	8746905	2982040	36402337		2004	0.308328	0.181312	1.04422
17	2005	23394125	11725448	2519604	37639177		2005	0.313802	0.17467	1.06065
18	2006	24080742	10515917	2703221	37299880		2006	0.301384	0.178205	0.867827
19	2007	24249082	10077958	2594457	36921497		2007	0.304577	0.183707	0.878531
20	2008	23948719	10475826	2691097	37115642		2008	0.297192	0.181881	0.841088
21	2009	21652624	9489222	2548596	33690442		2009	0.291864	0.182116	0.881561
22	2010	22171524	5120033	2511594	29803151		2010	0.293015	0.184797	0.907278
23	2011	21493431	3825518	2509376	27828325		2011	0.298028	0.18807	0.924881
24	2012	20783665	3812458	2455185	27051308		2012	0.299058	0.188065	0.92359
25	2013	22426438	7736448	2186401	32349287		2013	0.315274	0.185324	0.906017
26	2014	20998675	7589501	2081060	30669236		2014	0.288206	0.183359	0.948327
27	2015	21400492	7928191	2101404	31430087		2015	0.281511	0.18394	0.950754
28	2016	23568054	8990455	1796925	34355434		2016	0.301619	0.170218	0.935219
				Average (last 5 years):	3.11711e+07
Electric power consumption by water source area (kWh)							Electricity cost per unit of water (JPY/m3)
	Year	PW-6 Kengun	PW-8 Shoguchi	PW-10 Takuma	Total		Year	PW-6 Kengun	PW-8 Shoguchi	PW-10 Takuma
57	1982	11042604		2391842	13434446		1982	7.50651		17.6654
58	1983	10906498	318806	2395612	13620916		1983	6.85181	13.2331	16.8963
59	1984	10317941	1730139	2782178	14830258		1984	6.78012	4.44841	16.703
60	1985	8945564	2640820	2854418	14440802		1985	6.76799	4.2035	17.8546
61	1986	8699342	2449426	3145656	14294424		1986	6.19056	3.62019	15.813
62	1987	8759908	2090060	3339299	14189267		1987	5.83985	2.93683	14.8496
0	1988	9233504	2160820	3375306	14769630		1988	5.17462	3.11968	14.3821
1	1989	10338524	2075860	3297251	15711635		1989	5.31815	2.68181	13.8814
2	1990	10053215	1855297	3267661	15176173		1990	5.38	2.11669	14.1257
3	1991	10119321	1915781	3294215	15329317		1991	5.41031	1.9543	14.3692
4	1992	8172731	2322005	3351204	13845940		1992	5.05757	2.57448	15.0317
5	1993	7678001	2290615	3266974	13235590		1993	4.81402	2.56901	14.1815
6	1994	7878485	2402179	3320419	13601083		1994	4.71359	2.53198	14.5217
7	1995	7361082	2470446	3305263	13136791		1995	4.61329	2.4062	14.7385
8	1996	7614016	2593978	3367367	13575361		1996	4.40245	2.27371	14.6095
9	1997	7745038	1928522	3360750	13034310		1997	4.76538	2.02702	15.048
10	1998	6594254	2172100	3123456	11889810		1998	4.11222	2.03561	13.5156
11	1999	7149485	1938787	3158440	12246712		1999	3.64547	2.14986	13.6803
12	2000	7543525	1750433	3141449	12435407		2000	3.28822	1.81671	13.2419
13	2001	7576811	1658413	3154412	12389636		2001	3.36646	1.76742	12.331
14	2002	7944882	1421418	3085552	12451852		2002	3.33744	1.8229	11.5606
15	2003	8063941	1333679	3087333	12484953		2003	3.2703	1.81189	11.5245
16	2004	7607508	1585920	3113895	12307323		2004	3.3085	1.71031	12.0084
17	2005	7341124	2048086	2672430	12061640		2005	3.1952	1.37318	11.9048
18	2006	7257555	1873989	2345929	11477473		2006	2.96778	1.42882	9.6854
19	2007	7385701	1851395	2279310	11516406		2007	3.01148	1.46793	9.79136
20	2008	7117367	1905349	2263450	11286166		2008	3.25668	1.52754	10.3729
21	2009	6319632	1728141	2246743	10294516		2009	3.07268	1.64512	10.0262
22	2010	6496579	946169	2278713	9721461		2010	2.92341	2.0759	10.3616
23	2011	6405638	719466	2320874	9445978		2011	3.20352	2.39962	11.1872
24	2012	6215530	716990	2267585	9200105		2012	3.38412	2.50157	11.6336
25	2013	7070470	1433750	1980916	10485136		2013	4.19067	2.29527	13.6584
26	2014	6051940	1391600	1973526	9417066		2014	4.26785	2.47275	15.3178
27	2015	6024470	1458310	1997918	9480698		2015	3.99859	2.32168	14.2685
28	2016	7108584	1530336	1680519	10319439		2016	4.25942	1.95421	13.9675
				Average (last 5 years):	9.78049e+06
Eletricity expenditure by water source area (JPY)							Electricity unit cost (JPY/kWh)
	Year	PW-6 Kengun	PW-8 Shoguchi	PW-10 Takuma	Total		Year	PW-6 Kengun	PW-8 Shoguchi	PW-10 Takuma
57	1982	209612734		48209766	257822500		1982	18.9822		20.1559
58	1983	209015539	9751702	48485733	267252974		1983	19.1643	30.5882	20.2394
59	1984	195595021	34603060	55267408	285465489		1984	18.9568	20.0002	19.8648
60	1985	173139580	50562645	56873940	280576165		1985	19.3548	19.1466	19.9249
61	1986	162141742	40632260	55515211	258289213		1986	18.6384	16.5885	17.6482
62	1987	153357256	29436655	54859715	237653626		1987	17.5067	14.0841	16.4285
0	1988	141943443	33032645	52316227	227292315		1988	15.3727	15.2871	15.4997
1	1989	158383771	27582266	50225254	236191291		1989	15.3198	13.2872	15.2325
2	1990	153386377	25643246	49889185	228918808		1990	15.2574	13.8216	15.2676
3	1991	154233289	24805868	50371653	229410810		1991	15.2415	12.9482	15.2909
4	1992	131815917	29190605	51251712	212258234		1992	16.1287	12.5713	15.2935
5	1993	124143063	28600093	49310084	202053240		1993	16.1687	12.4858	15.0935
6	1994	122783361	29425408	49625653	201834422		1994	15.5846	12.2495	14.9456
7	1995	113335110	29712060	49374045	192421215		1995	15.3965	12.027	14.938
8	1996	107417560	29767756	48925281	186110597		1996	14.1079	11.4757	14.5292
9	1997	114070904	22847435	50222770	187141109		1997	14.7283	11.8471	14.9439
10	1998	95178952	23171601	43609420	161959973		1998	14.4336	10.6678	13.9619
11	1999	92300690	22206511	43576331	158083532		1999	12.9101	11.4538	13.7968
12	2000	87251370	17355858	42207254	146814482		2000	11.5664	9.91518	13.4356
13	2001	88073901	16394559	39443764	143912224		2001	11.6241	9.88569	12.5043
14	2002	87903390	14760218	36722958	139386566		2002	11.0642	10.3842	11.9016
15	2003	85884210	13883240	35653943	135421393		2003	10.6504	10.4097	11.5485
16	2004	81632033	14959922	35809678	132401633		2004	10.7305	9.43296	11.5
17	2005	74748807	16101168	29995276	120845251		2005	10.1822	7.86157	11.224
18	2006	71466387	15025321	26181770	86491708		2006	9.84717	8.01783	11.1605
19	2007	73025651	14793744	25403258	87819395		2007	9.88744	7.99059	11.1452
21	2008	77993202	16002288	27914612	121910102		2008	10.9582	8.39861	12.3328
22	2009	66531612	15610874	25552697	107695183		2009	10.5278	9.03333	11.3732
23	2010	64816445	10628696	26024223	101469364		2010	9.97701	11.2334	11.4206
23	2011	68854548	9179791	28072963	106107302		2011	10.7491	12.7592	12.0959
24	2012	70334500	9537119	28562701	108434320		2012	11.3159	13.3016	12.5961
25	2013	93981867	17757243	29862644	141601754		2013	13.2922	12.3852	15.0752
26	2014	89619155	18766925	31877183	140263263		2014	14.8083	13.4859	16.1524
27	2015	85571714	18406760	29983902	133962376		2015	14.204	12.622	15.0076
28	2016	100386141	17569241	25098500	143053882		2016	14.1218	11.4806	14.935
				Average (last 5 years):	133463119				Average (most recent year):	13.5125

## Sheet: Midstream area recharge
Source: Model evaulation of artificial gw recharge at MSA PPT, slide 19
Target area	Water budget component	Unit	Case 1 no paddy	Case 2 100% paddy	Case 3 50% paddy	Case 4 50% paddy + water ponding
Ground surface (Total Kumamoto area)	Precipitation (2013)	million m3/yr	2036	2036	2036	2036
		mm/day	5.52	5.52	5.52	5.52
	Evapotranspiration (2013)	million m3/yr	749	750	750	750
		mm/day	2.03	2.03	2.03	2.03
	GW recharge (2013) [including irrigation]	million m3/yr	1576	1690	1657	1668
		mm/day	4.27	4.58	4.49	4.52
No 2 aquifer top (Total Kumamoto area)	GW recharge	million m3/yr	490	582	552	557
		mm/day	1.33	1.58	1.5	1.51
	GW uptake	million m3/yr	158	158	158	158	Does this mean withdrawals?
		mm/day	0.43	0.43	0.43	0.43
Mid stream of Shira river	GW recharge from ground surface (including irrigation)	million m3/yr	288	415	367	377	Not sure how to interpret but maybe total recharge change is 10 (377-367) and of that 10 about 6 (212-206) goes to No 2 aquifer
		mm/day	8.37	12.03	10.65	10.94
	GW recharge to No 2 aquifer	million m3/yr	144	236	206	212	With constant precipitation, increase of 6 million m3/yr
		mm/day	4.17	6.86	5.96	6.14
Lake Ezu	Discharge from ground surface	million m3/yr	159	181	174	175
	Discharge from top of No 2 aquifer	million m3/yr	162	185	178	179

## Sheet: Hydrology parameters
Geology	Hydraulic coefficient (cm/s)	Effective porosity
Surface soil	1.0 x 10^-2	0.5
Alluvium and terrace	5.0 x 10^-5	0.3
Weathered zone	1.0 x 10^-5	0.3
Ariake clay	1.0 x 10^-5	0.3
Aso 4	1.0 x 10^-2	0.2
Lacustrine	1.0 x 10^-7	0.01
Aso 1-3	1.0 x 10^-6 ~ 1.0 x 10^0	0.03	Actually aquifer no 2 includes Aso 1-3 and Togawa lava but Jun said ok to use 0.2
Togawa lava	4.0 x 10^-2	0.2
Tertiary bed rock	1.0 x 10^-5	0.1
	Average:	0.215556
Source: Jun Shimada
Aquifer (No 2) area:	945	km2
Conversion:	1000000	m2/km2
Area in m2:	945000000	m2
Thickness	10-200	m
Source: Takahiro Hisono

## Sheet: Mashiki pumping
		Pumped quantity (m3)						Additional information	Mashiki PW-3	Mashiki PW-4	Mashiki PW-5	Mashiki PW-9
	Year	Mashiki PW-3	Mashiki PW-4	Mashiki PW-5	Mashiki PW-9	Total		Screen depth (m)	47-94	52-98	51-111	86-119
354	1979	328899	328899			657798		Well depth (m)	100	100	114.4	130
355	1980	187076	187076			374152		Days pumped per year	365	365	365	365
356	1981	192910	192910			385820		Average daily pumping (m3)	921	855	1771	1256
357	1982	255692	255692			511384		Average annual pumping (m3)	336165	312075	646415	458440
358	1983	261924	261924			523848
359	1984	290590	290590			581180
360	1985	384308	384308			768616
361	1986	361788	361788			723576
362	1987	417797	417797			835594
363	1988	321765	321765			643530
401	1989	437905	437905			875810
402	1990	432262	432262			864524
403	1991	452658	452049			904707
404	1992	500754	501667			1002421
405	1993	462703	496188			958891
406	1994	547938	550982			1098920
407	1995	457866	579963			1037829
408	1996	548736	434416	823104		1806256
409	1997	505250	353493	732536		1591279
410	1998	481197	365105	732544		1578846
411	1999	491445	326807	762190		1580442
412	2000	502060	327192	763014		1592266
413	2001	582226	530445	868826		1981497
414	2002	638096	569768	792161		2000025
415	2003	458908	351108	804221	223530	1837767
416	2004	485252	374576	812385	396493	2068706
417	2005
418	2006	464078	363627	750560	366111	1944376
419	2007	476714	328839	789763	351349	1946665
420	2008	447043	373041	785242	418061	2023387
421	2009	465729	397704	782238	438744	2084415
422	2010	461637	377979	776234	437704	2053554
423	2011	398587	334041	776875	382043	1891546
424	2012	336254	312292	646658	458693	1753897
425	2013	252684	306859	548183	438537	1546263
426	2014	246510	294268	475181	458766	1474725
427	2015	373332	379530	469683	388903	1611448
428	2016	723481	419071	668388	505715	2316655
					Average (last 5 years):	1.7406e+06

## Sheet: Subsidy and recharge
	2004	2005	2006	2007	2008	2009	2010	2011	2012	2013	2014	2015	2016	2017	Average	Total
Number of participating farmers (people)	347	422	467	525	512	534	506	549	547	527	473	445	138	392	456	6384
Total subsidy amount (yen)	31364108	34051948	41221931	49362278	55227934	56268711	55990563	63546447	55730870	60461553	54849860	56299609	15476688	50592662	4.86032e+07	680445162	is equal to	427921	USD/yr
Paddy field area (m2)	2910822	2844143	3885146	4742595	5455642	5590673	5502774	6292725	4871436	5719611	5166533	5225645	1310616	4489711	4.57201e+06	64008072	is equal to	15815	acres
Estimated amount of recharge (m3)	8732000	8532000	11655000	14228000	16367000	16772000	16508000	18878000	14614000	17159000	15500000	15677000	3932000	13469000	1.37159e+07	192023000	is equal to	50.7	billion gallons	or	9.92584	MGD

## Sheet: Sharp interface calcs
Mink (1980), p 68, eqn 7:		V = 41yS [h0x + 2/3bx^3/2]
V=	volume
y=	width of the aquifer
S=	effective porosity
h0=	initial head
x=	distance upgradient from x=0 (length of aquifer)
b=	(h-h0)/x^1/2
	0 if upper and lower surfaces flat instead of parabolic (h=h0 in that case)
Then eqn (7) can be simplified as follows:
V = 41ySx*h0
dh/dV = 1/(41ySx)
If V is measured in m3, y in m, x in m, h in m, and S has no units, then we are done
To measure a change in h for a change in volume, we would apply the formula as follows
dh = dV/(41ySx)
Parameters for Kumamoto
y*x=	945000000	m
S=	0.2
dV=	1.37159e+07	m3	(average estimated increase in recharge due to subsidy over the period 2004-2017)
dh=	0.00177003	m
V=	77490000000	m3	(total volume for comparison if h=10 m)
dV/V=	0.000177003		(change due to ponding relative to total volume)
From the water depth and pump costs tab start with the relationship between lift and energy required
z = .0044w + .1021
z=	kWh/m3
w=	m
dz=	-7.78811e-06	kWh/m3
Average (most recent 5 years) annual pumping from Kumamoto and Mashiki wells:						32911668	m3/year
Total decrease in energy required=						-256.32	kWh/year
Average price per kWh (most recent year for Kumamoto wells)=						13.5125	JPY/kWh
Total change in energy cost=						-3463.52	JPY/year
For a hypothetical 1 m increase in head
Decrease in energy required per m3 pumped=				-0.0044	kWh/m3
Total decrease in energy required=				-144811	kWh/year
Total change in energy cost=				-1.95676e+06	JPY/year

## Sheet: Trends
Pumping (m3)
Year (J)	Year	Mashiki PW-3	Mashiki PW-4	Mashiki PW-5	Mashiki PW-9	Kumamoto PW-6	Kumamoto PW-8	Kumamoto PW-10	Total
354	1979	328899	328899						657798
355	1980	187076	187076						374152
356	1981	192910	192910						385820
357	1982	255692	255692						511384
358	1983	261924	261924						523848
359	1984	290590	290590						581180
360	1985	384308	384308						768616
361	1986	361788	361788						723576
362	1987	417797	417797						835594
363	1988	321765	321765						643530
401	1989	437905	437905						875810
402	1990	432262	432262						864524
403	1991	452658	452049						904707
404	1992	500754	501667						1002421
405	1993	462703	496188						958891
406	1994	547938	550982						1098920
407	1995	457866	579963						1037829
408	1996	548736	434416	823104					1806256
409	1997	505250	353493	732536					1591279
410	1998	481197	365105	732544					1578846
411	1999	491445	326807	762190					1580442
412	2000	502060	327192	763014					1592266
413	2001	582226	530445	868826					1981497
414	2002	638096	569768	792161					2000025
415	2003	458908	351108	804221	223530				1837767
416	2004	485252	374576	812385	396493				2068706
417	2005
418	2006	464078	363627	750560	366111	24080742	10515917	2703221	39244256
419	2007	476714	328839	789763	351349	24249082	10077958	2594457	38868162																					OW 5 goes with Kumamoto 10
420	2008	447043	373041	785242	418061	23948719	10475826	2691097	39139029
421	2009	465729	397704	782238	438744	21652624	9489222	2548596	35774857
422	2010	461637	377979	776234	437704	22171524	5120033	2511594	31856705
423	2011	398587	334041	776875	382043	21493431	3825518	2509376	29719871
424	2012	336254	312292	646658	458693	20783665	3812458	2455185	28805205																					OW 10 goes with all Mashiki wells
425	2013	252684	306859	548183	438537	22426438	7736448	2186401	33895550
426	2014	246510	294268	475181	458766	20998675	7589501	2081060	32143961
427	2015	373332	379530	469683	388903	21400492	7928191	2101404	33041535
428	2016	723481	419071	668388	505715	23568054	8990455	1796925	36672089
																														OW 1 goes with Kumamoto 6 and 8
Head level (m)
Year (J)	Year	Kumamoto OW-1	Kumamoto OW-5	Kumamoto OW-10
357	1982	7.5323	28.2656
358	1983	7.3822	27.0479
359	1984	7.18364	24.4678
360	1985	7.18641	24.8732
361	1986	7.16291	24.5133
362	1987	7.35073	27.0768	17.6822
363	1988	7.37298	27.8007	17.6805
401	1989	7.23157	25.4064	16.461
402	1990	7.14293	24.197	15.926
403	1991	7.13441	21.364	15.8623
404	1992	7.04066	23.0461	15.1674
405	1993	7.38254	27.4285	17.5632
406	1994	7.17434	25.9548	16.7314
407	1995	6.941	21.9525	14.7104
408	1996	6.94392	22.2203	14.8586
409	1997	7.08023	23.7003	15.6996
410	1998	7.21426	25.6411	16.455
411	1999	7.07641	23.4031	15.5509
412	2000	7.00218	23.1985	15.2248
413	2001	6.97379	23.0517	15.0489
414	2002	6.93397	22.3884	14.7767
415	2003	6.99383	23.1934	15.0517
416	2004	6.99963	22.877	15.2303
417	2005	6.9282	22.1241	14.8948
418	2006	7.14776	24.8925	16.1605
419	2007	7.15073	24.8585	16.2725
420	2008	7.10163	23.4774	15.6197
421	2009	7.07258	23.4797	15.5322
422	2010	7.14499	24.0893	15.6874
423	2011	7.12909	23.8273	15.6324
424	2012	7.24552	24.8296	16.3074
425	2013	7.1622	24.0366	15.825
426	2014	7.06851	22.704	15.1368
427	2015	7.11085	23.3532	15.3553
428	2016	7.05162	26.378	16.4866
429	2017	7.00181	27.1405	16.6971
Precipitation (mm)
Year (J)	Year	Weather station
357	1982	2050
358	1983	1716
359	1984	1724.5
360	1985	2121
361	1986	1799.5
362	1987	2752.5
363	1988	2204
364	1989	2104.5
365	1990	1952.5
366	1991	2222.5
367	1992	1592.5
368	1993	3369
369	1994	920.5
370	1995	1875.5
371	1996	1489.5
372	1997	2395
373	1998	1905
374	1999	1946
375	2000	1825.5
376	2001	1798.5
377	2002	1543.5
378	2003	2256
379	2004	1804.5
380	2005	1324.5
381	2006	2800.5
382	2007	1810.5
383	2008	2353
384	2009	1565.5
385	2010	2072.5
386	2011	2154.5
387	2012	2209.5
388	2013	1930
389	2014	1694
390	2015	2292
391	2016	2504
392	2017	1818.5
Electricity expenditures (JPY)
Year (J)	Year	Kumamoto PW-6	Kumamoto PW-8	Kumamoto PW-10	Total
20	2008	77993202	16002288	27914612	121910102
21	2009	66531612	15610874	25552697	107695183
22	2010	64816445	10628696	26024223	101469364
23	2011	68854548	9179791	28072963	106107302
24	2012	70334500	9537119	28562701	108434320
25	2013	93981867	17757243	29862644	141601754
26	2014	89619155	18766925	31877183	140263263
27	2015	85571714	18406760	29983902	133962376
28	2016	100386141	17569241	25098500	143053882

## Sheet: Farmer Income
		million JPY		1000 JPY		JPY			million JPY		1000 JPY		JPY			JPY	USD
	Year	Ozu ag income	Ozu farm households	Ozu ag income per household	Ozu subsidized farms*	Ozu avoided farm income loss	Ozu avg income per capita	Ozu opp cost	Kikuyo ag income	Kikuyo farm households	Kikuyo ag income per household	Kikuyo subsidized farms*	Kikuyo avoided farm income loss	Kikuyo avg income per capita	Kikuyo opp cost	Combined avoided farm income loss	Combined avoided farm income loss
S57	1982	3513.73							2864.64
S58	1983	3757.11							2752.75
S59	1984	4383.62							3001.29
S60	1985	4590.15							3028.12
S61	1986	4471.93							2951.24
S62	1987	4378.85							2804.15
S63	1988	4202.25							2899.67
H1	1989	4017.86							2781.83
H2	1990	5686.47							3561.7
H3	1991	5253.99							3125.43
H4	1992	5470.37							3329.39
H5	1993	5046.43							3008.77
H6	1994	5628.13							3240.28
H7	1995	5027.85							2977.79
H8	1996	5154.65							2908.65
H9	1997	4979.29							2700.12
H10	1998	5230.94							2923.99
H11	1999	5126.81							2128.46
H12	2000	4000.66							2359.49
H13	2001	3669.03	864	4246.57			2674.64		2183.14	559	3905.43			2562.77
H14	2002	3744.39	864	4333.79			2662.29		2106.94	559	3769.12			2594.23
H15	2003	3421.64	864	3960.24			2546.75		2018.02	559	3610.06			2547.57
H16	2004	3671.93	864	4249.91	210.687	8.95403e+08	2590.52	349612	1907.03	559	3411.5	136.313	4.65031e+08	2588.93	112127	1.36043e+09	1.29565e+07
H17	2005	3466.11	864	4011.71	256.225	1.0279e+09	2489.3	390077	1971.81	559	3527.39	165.775	5.84753e+08	2507.86	169013	1.61265e+09	1.53586e+07
H18	2006	2775.54	592	4688.41	273.456	1.28207e+09	2644.32	558969	1635.18	419	3902.58	193.544	7.55321e+08	2636.32	245077	2.03739e+09	1.94038e+07
H19	2007	2471.95	592	4175.59	307.418	1.28365e+09	2745.88	439521	2031.26	419	4847.88	217.582	1.05481e+09	2765.1	453174	2.33846e+09	2.22711e+07
H20	2008	2675.74	592	4519.83	299.806	1.35507e+09	2757.64	528316	1905.56	419	4547.88	212.194	9.65031e+08	2753.15	380829	2.3201e+09	2.20962e+07
H21	2009	2843.87	592	4803.83	312.688	1.5021e+09	2705.07	656260	1799.27	419	4294.2	221.312	9.50356e+08	2723.87	347532	2.45246e+09	2.33568e+07
H22	2010	3101.11	592	5238.36	296.293	1.55209e+09	2768.07	731929	1839.07	419	4389.19	209.707	9.20445e+08	2786.3	336137	2.47253e+09	2.35479e+07
H23	2011	2897.41	460	6298.72	307.226	1.93513e+09	2765.45	1.08551e+06	1910.57	362	5277.82	241.774	1.27604e+09	2806.34	597539	3.21117e+09	3.05826e+07
H24	2012	2642.23	460	5743.98	306.107	1.75827e+09	2770.21	910291	1787.77	362	4938.59	240.893	1.18967e+09	2810.29	512692	2.94794e+09	2.80757e+07
H25	2013	2969.21	460	6454.8	294.915	1.90362e+09	2796.39	1.07892e+06	1811.1	362	5003.04	232.085	1.16113e+09	2843.51	501194	3.06475e+09	2.91881e+07
H26	2014	3140	460	6826.09	264.696	1.80684e+09	2829.03	1.05801e+06	1891.79	362	5225.94	208.304	1.08858e+09	2883.02	488040	2.89542e+09	2.75754e+07
H27	2015	3105.74	460	6751.61					1845.15	362	5097.1
															Average:	2.42848e+09
Agricultural income source: https://www.pref.kumamoto.jp/kiji_17143.html															Minimum:	1.36043e+09
Number of households source: https://www.pref.kumamoto.jp/hpkiji/pub/List.aspx?c_id=3&class_set_id=1&class_id=5232															Maximum:	3.21117e+09
Averge income source: https://www.pref.kumamoto.jp/kiji_9030.html
*Calculated as proportion of total farms (Ozu+Kikuyo) x total # participating farmers in subsidy program

[truncated: 4 more sheets: Scenarios, Pumping synergy loss, Farmer synergy loss, 5-m head drop]
